# Supplementary material for: Citation Network Study on the Use of New Technologies in Neurorehabilitation
Source: MDPI journal article supplement (doi:10.3390/ijerph19010026), 2021-12-21
Supplement: s1 [file s1]

Supplementary Material.

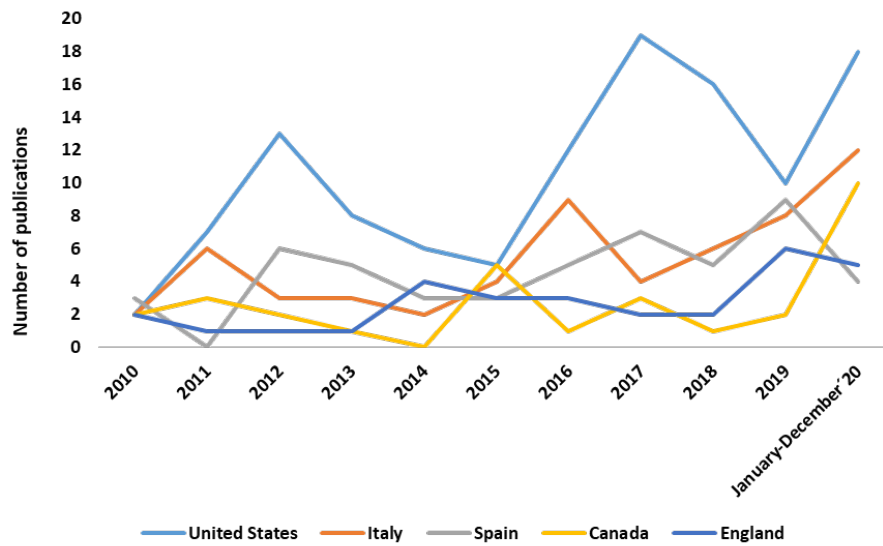

Supplementary figure S1. Number of publications by country and year.

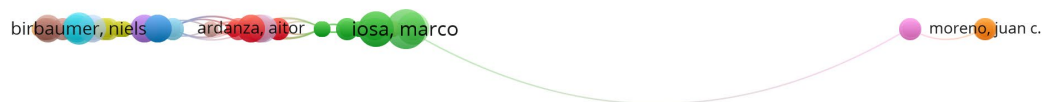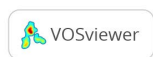

**Supplementary figure S2.** Collaboration between authors.

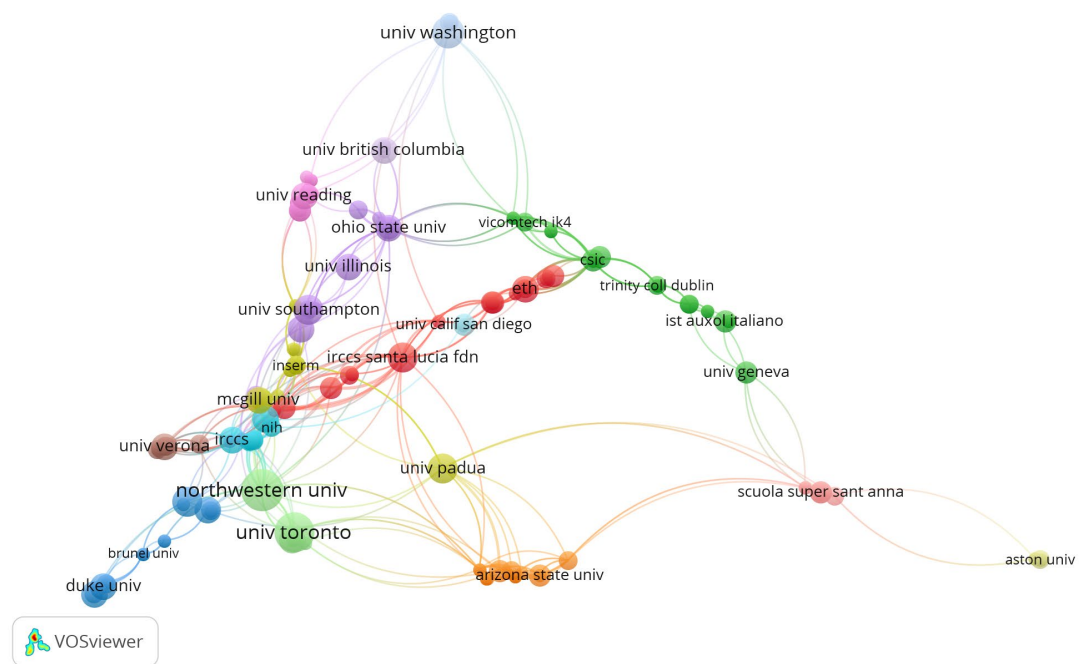

**Supplementary figure S3.** Collaboration between institutions.

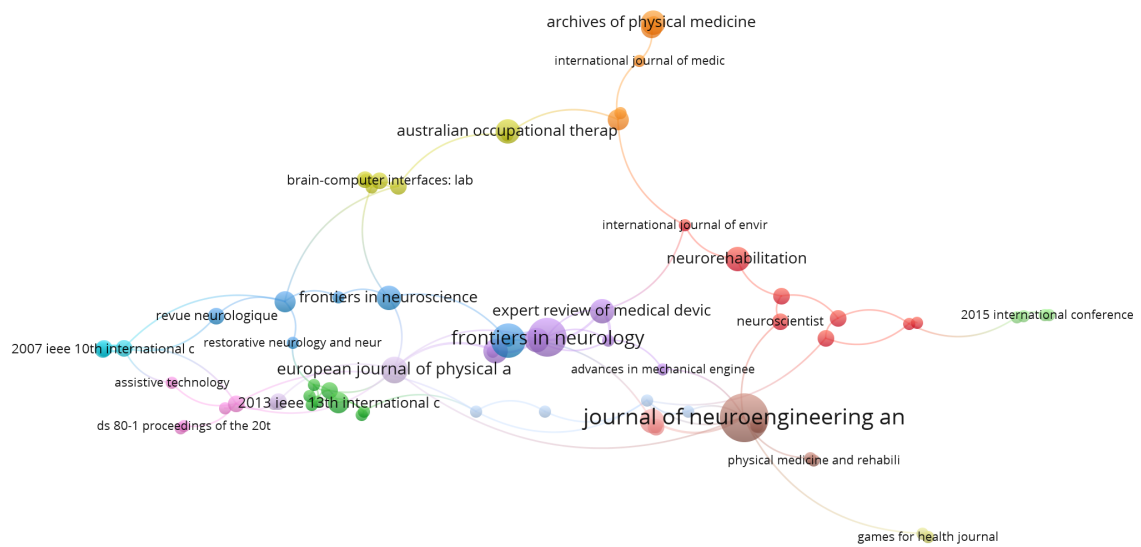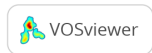

**Supplementary figure S4.** Collaboration between journals.

**Supplementary table S1.** Top 10 research areas with the highest number of publications

| Category                                | Frequency | Centrality | Degree | HalfLife |
|-----------------------------------------|-----------|------------|--------|----------|
| Rehabilitation                          | 132       | 0.17       | 37     | 22.5     |
| Neurosciences and<br>Neurology          | 124       | 0.32       | 48     | 21.5     |
| Clinical Neurology                      | 71        | 0.08       | 29     | 19.5     |
| Biomedical<br>Engenieering              | 70        | 0.12       | 44     | 14.5     |
| Computer Sciences                       | 58        | 0.12       | 45     | 14.5     |
| Robotics                                | 29        | 0.01       | 21     | 12.5     |
| Electric and Electronic<br>Engenieering | 27        | 0.06       | 31     | 15.5     |
| Medical Information                     | 23        | 0.01       | 13     | 7.5      |
| Internal and General<br>Medicine        | 20        | 0.06       | 17     | 18.5     |
| Psychology                              | 19        | 0.11       | 19     | 2.5      |

**Supplementary table S2.** Top 10 authors with the largest number of publications

| <b>Author</b> | <b>Number of publications</b> | <b>H Index</b> | <b>Total citations</b> | <b>Citation average*</b> | <b>Centrality</b> | <b>Degree</b> |
|---------------|-------------------------------|----------------|------------------------|--------------------------|-------------------|---------------|
| Iosa M        | 6                             | 4              | 115                    | 19.5                     | 0.00              | 6             |
| Morone G      | 5                             | 4              | 113                    | 22.6                     | 0.00              | 4             |
| Paolucci S    | 5                             | 4              | 113                    | 22.6                     | 0.00              | 4             |
| Casana J      | 4                             | 0              | 0                      | 0                        | 0.00              | 6             |
| Nygard L      | 4                             | 4              | 53                     | 13.25                    | 0.00              | 3             |
| Volpe BT      | 3                             | 3              | 305                    | 101.67                   | 0.00              | 5             |
| Ardanza A     | 3                             | 2              | 20                     | 6.67                     | 0.00              | 11            |
| De Mauro A    | 3                             | 2              | 20                     | 6.67                     | 0.00              | 11            |
| Gomez EJ      | 3                             | 1              | 2                      | 0.67                     | 0.00              | 6             |
| Hummer FC     | 3                             | 3              | 63                     | 21.0                     | 0.00              | 0             |

\* Self-citations have not been considered

**Supplementary table S3.** Top 10 institutions with the largest number of publications

| Category                                             | Frequency | Centrality | Degree | HalfLife |
|------------------------------------------------------|-----------|------------|--------|----------|
| IRCCS Santa Lucia                                    | 8         | 0.00       | 2      | 2.5      |
| Universidad de Valencia                              | 8         | 0.00       | 1      | 1.5      |
| Consejo superior de investigaciones científicas CSIC | 6         | 0.00       | 1      | 0.5      |
| State University system of Florida                   | 5         | 0.00       | 0      | -0.5     |
| Universidade de Sao Paulo                            | 5         | 0.00       | 0      | -0.5     |
| Northwestern university                              | 4         | 0.02       | 16     | 2.5      |
| University of Montreal                               | 4         | 0.00       | 2      | -0.5     |
| Catholic University of The Sacred Heart              | 4         | 0.06       | 5      | -0.5     |
| Sapienza university Rome                             | 4         | 0.00       | 2      | 2.5      |
| University of california system                      | 4         | 0.00       | 3      | -0.5     |

**Supplementary table S4.** Top ten journals with the largest number of publications

| Journal                                                         | Total number of publicaciones | Impact factor (2019) | Quartile | SJR (2019) | Citation/Docs (2 years) | Total number of citations (2019) | Centrality | H Index | Country        |
|-----------------------------------------------------------------|-------------------------------|----------------------|----------|------------|-------------------------|----------------------------------|------------|---------|----------------|
| <i>Journal of neuroengineering and rehabilitation</i>           | 15                            | 3.52                 | Q1       | 1.14       | 4.228                   | 1652                             | 0.00       | 85      | United Kingdom |
| <i>Disability and rehabilitation assistive technology</i>       | 11                            | -                    | -        | 0.56       | 2.221                   | 652                              | 0.00       | 35      | United Kingdom |
| <i>Frontiers in neurology</i>                                   | 9                             | 2.89                 | Q2       | 1.06       | 3.184                   | 6086                             | 0.00       | 57      | Switzerland    |
| <i>British journal of occupational therapy</i>                  | 8                             | 0.96                 | Q3       | 0.38       | 1.007                   | 253                              | 0.00       | 44      | United Kingdom |
| <i>American journal of occupational therapy</i>                 | 6                             | 2.23                 | Q1       | 0.71       | 1.373                   | 607                              | 0.00       | 77      | United States  |
| <i>Functional neurology</i>                                     | 5                             | 1.85                 | Q3       | 0.72       | 1.700                   | 184                              | 0.00       | 40      | Italy          |
| <i>Scandinavian journal of occupational therapy</i>             | 5                             | 1.35                 | Q2       | 0.50       | 1.608                   | 228                              | 0.00       | 37      | United Kingdom |
| <i>Physical Therapy</i>                                         | 4                             | 3.14                 | Q1       | 1.14       | 2.990                   | 1355                             | 0.00       | 142     | United States  |
| <i>European journal of physical and rehabilitation medicine</i> | 3                             | 2.26                 | Q1       | 0.83       | 2.420                   | 717                              | 0.00       | 53      | Italy          |
| <i>Expert review of medical devices</i>                         | 3                             | 2.20                 | Q3       | 0.60       | 2.388                   | 726                              | 0.00       | 60      | United Kingdom |
